# Supplementary material
Source: PubMed Central journal article supplement (PMC1180796)

A

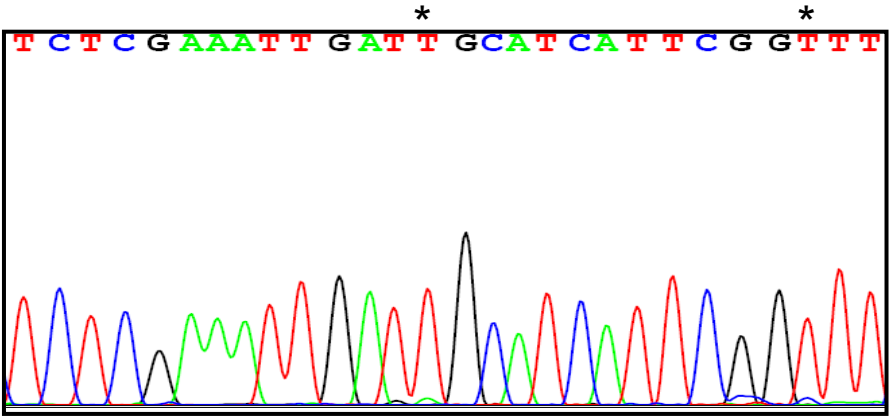

B

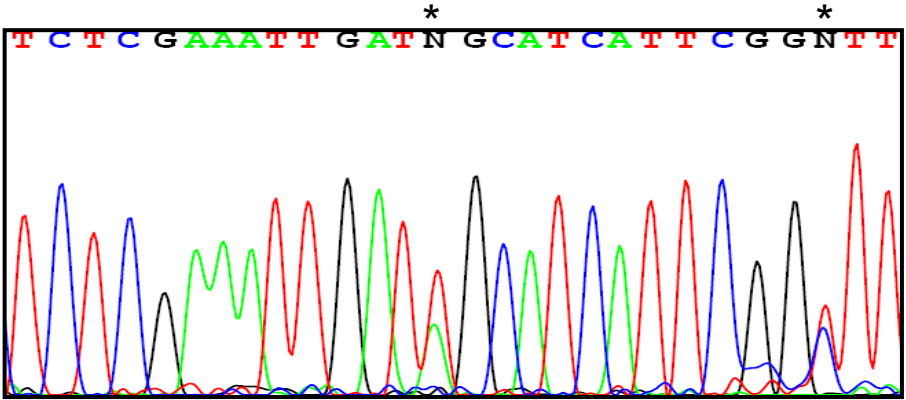

C

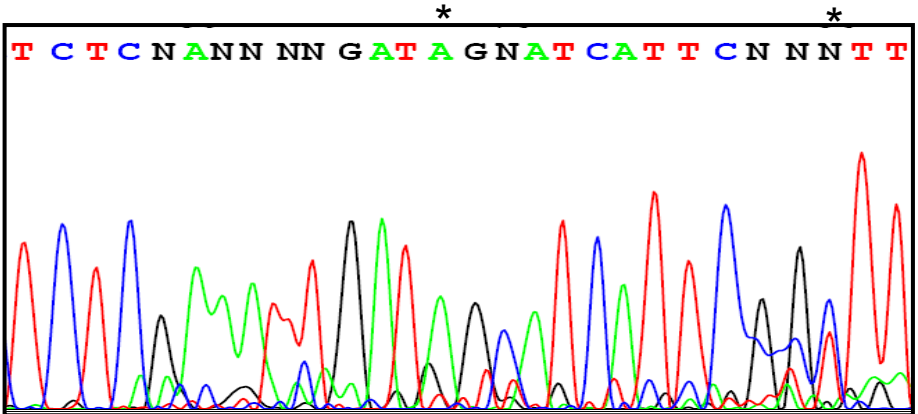

Supplement: pnas_0504662102_2.pdf [file pnas_0504662102_2.pdf]
